# Supplementary material
Source: PubMed Central journal article supplement (PMC3362881)
Supplement: supp_112.191577_JPET191577_supplement.pdf [file supp_112.191577_JPET191577_supplement.pdf]

## **Journal of Pharmacology and Experimental Therapeutics**

Molecular Determinants of Ligand Selectivity for the Human Multidrug And Toxin Extrusion Proteins, MATE1 and MATE-2K

Bethzaida Astorga, Sean Ekins, Mark Morales and Stephen H Wright

Department of Physiology, University of Arizona, Tucson, AZ 85724, USA (B.A., M.M., and S.H.W.)

Collaborations in Chemistry, 5616 Hilltop Needmore Road, Fuquay-Varina NC 27526, USA (S.E.)

Supplemental Table 1. Compounds selected by the common features pharmacophore after searching a database of 2690 FDA approved compounds ([www.collaboratedrug.com](http://www.collaboratedrug.com)).

| FitValue | Common Name                                   | Indication                  |
|----------|-----------------------------------------------|-----------------------------|
| 3.93897  | PYRIMETHAMINE                                 | Antimalarial                |
| 3.3167   | naloxone<br>Naloxone Hydrochloride            | Antidote                    |
| 3.27622  | DEXMEDETOMIDINE                               | Anxiolytic                  |
| 3.2407   | Chlordantoin                                  | Antifungal                  |
| 3.1776   | NALORPHINE<br>Nalorphine Hydrochloride        | Antidote                    |
| 3.15108  | Perfosfamide                                  | Antineoplastic              |
| 3.11759  | Cinchonidine Sulfate<br>Cinchonidine          | Antimalarial                |
| 3.10352  | Cinchonine Sulfate<br>Cinchonine              | Antimalarial                |
| 3.07469  | METHOHEXITAL                                  | Anesthetic                  |
| 3.06799  | PROGUANIL<br>PROGUANIL HYDROCHLORIDE<br>100MG | Antimalarial                |
| 3.05018  | TOPIRAMATE                                    | Anticonvulsant              |
| 3.04366  | MIDODRINE<br>Midodrine Hydrochloride          | Antihypertensive            |
| 2.98558  | Chlorbetamide                                 | Antiamebic                  |
| 2.98463  | TRIMETHOPRIM                                  | Antibiotic<br>Antibacterial |
| 2.98457  | ZILEUTON                                      | Antiinflammatory            |
| 2.94205  | AMINOMETRADINE                                | Diuretic                    |
| 2.89284  | SCOPOLAMINE<br>ScopolamineHydrobromide        | Antispasmodic               |

|         |                                                                     |                 |
|---------|---------------------------------------------------------------------|-----------------|
| 2.88791 | ARTICAINE                                                           | Anesthetic      |
| 2.84534 | RITODRINE                                                           | Tocolytic       |
| 2.82357 | MITOBRONITOL<br>Mitolactol                                          | Antineoplastic  |
| 2.81033 | LORAZEPAM                                                           | Anxiolytic      |
| 2.74943 | ETHOHEXADIOL                                                        | Insecticide     |
| 2.64902 | METHOXAMINE<br>Methoxamine Hydrochloride                            | Antihypotensive |
| 2.63216 | URACIL MUSTARD                                                      | Antineoplastic  |
| 2.62879 | SECOBARBITAL<br>secobarbital sodium                                 | Sedative        |
| 2.62336 | Methitural                                                          | Sedative        |
| 2.6233  | THIAMYLAL                                                           | Anesthetic      |
| 2.62264 | METHYLDOPATE<br>Methyldopate Hydrochloride                          | Antiseptic      |
| 2.59665 | ISOCARBOXAZID                                                       | Antidepressant  |
| 2.5942  | FAMOTIDINE                                                          | Antiulcerative  |
| 2.57673 | Peldesine                                                           | Antineoplastic  |
| 2.55252 | vorinostat                                                          | Antineoplastic  |
| 2.53092 | OXYBENZONE                                                          | Dermatologic    |
| 2.50659 | Dichlorophen<br>Dichlorophene                                       | Anthelminthic   |
| 2.44664 | Oxamide                                                             | Anxiolytic      |
| 2.42605 | QUINIDINE GLUCONATE                                                 | Antimalarial    |
| 2.42605 | QUINIDINE<br>POLYGALACTURONATE 275MG<br>Quinidine Polygalacturonate | Antimalarial    |
| 2.42594 | NIALAMIDE                                                           | Antidepressant  |
| 2.42406 | PENTOBARBITAL                                                       | Sedative        |
| 2.41611 | THIOPENTAL<br>Thiopental Sodium                                     | Anesthetic      |
| 2.40768 | ETHAMBUTOL<br>Ethambutol Hydrochloride                              | Antibacterial   |

|         |                                                                                                                                              |                             |
|---------|----------------------------------------------------------------------------------------------------------------------------------------------|-----------------------------|
| 2.37852 | Dioxybenzone                                                                                                                                 | Dermatologic                |
| 2.37222 | Ubiquinol                                                                                                                                    |                             |
| 2.35757 | QUINETHAZONE                                                                                                                                 | Diuretic                    |
| 2.34956 | TRICHLORMETHIAZIDE                                                                                                                           | Diuretic                    |
| 2.30659 | EFAVIRENZ                                                                                                                                    | Antiviral                   |
| 2.30277 | IMIQUIMOD                                                                                                                                    | Antiviral                   |
| 2.28689 | DIHYDROCODEINE                                                                                                                               |                             |
| 2.28689 | DihydrocodeineBitartrate                                                                                                                     | Analgesic                   |
| 2.25638 | PHENTOLAMINE<br><br>Phentolamine Hydrochloride                                                                                               | Antihypertensive            |
| 2.25153 | CARISOPRODOL                                                                                                                                 | Muscle relaxant (skeletal)  |
| 2.24775 | STAVUDINE                                                                                                                                    | Antiviral                   |
| 2.23961 | NEPAFENAC                                                                                                                                    | Antiinflammatory            |
| 2.19761 | 2-cyano-3-hydroxy-N-[4-(trifluoromethyl)phenyl]hept-6-ynamide<br><br>(2Z)-2-cyano-3-hydroxy-N-[4-(trifluoromethyl)phenyl]-2-hepten-6-ynamide |                             |
| 2.19309 | ALKANET                                                                                                                                      | Antiseptic                  |
| 2.18273 | CODEINE                                                                                                                                      | Antitussive                 |
| 2.18273 | Codeine Phosphate                                                                                                                            | Antitussive                 |
| 2.16503 | MEFENAMIC ACID                                                                                                                               | Antiinflammatory            |
| 2.15091 | OXPRENOLOL<br><br>oxprenolol hydrochloride                                                                                                   | Antihypertensive            |
| 2.15023 | TROPICAMIDE                                                                                                                                  | Mydriatic<br><br>Ophthalmic |
| 2.13938 | Meclofenamic Acid<br><br>MECLOFENAMATE<br><br>Meclofenamate Sodium                                                                           | Antiinflammatory            |
| 2.1224  | Iopydol                                                                                                                                      | Diagnostic aid              |
| 2.10354 | Brivaracetam                                                                                                                                 | Nootropic                   |
| 2.07716 | Remacemide<br><br>Remacemide Hydrochloride                                                                                                   | Anticonvulsant              |
| 2.02021 | Almecillin                                                                                                                                   | Antibiotic                  |

|         |                                                                         |                                               |
|---------|-------------------------------------------------------------------------|-----------------------------------------------|
| 2.00987 | HYDROXYPHENAMATE                                                        | Anxiolytic                                    |
| 2.00066 | CIMETIDINE                                                              | Antiulcerative                                |
| 1.97202 | ABACAVIR<br>Abacavir Sulfate                                            | Antiviral                                     |
| 1.95059 | Modafinil<br>Armodafinil                                                | Nootropic                                     |
| 1.85633 | IFOSFAMIDE                                                              | Antineoplastic                                |
| 1.84656 | TYBAMATE                                                                | Anxiolytic                                    |
| 1.841   | MEPROBAMATE                                                             | Sedative                                      |
| 1.82933 | CHLORTHALIDONE                                                          | Diuretic                                      |
| 1.82785 | Vinbarbital                                                             | Sedative                                      |
| 1.82602 | ISOETHARINE<br>IsoetharineMesylate                                      | Bronchodilator                                |
| 1.76184 | morphine sulfate<br>Morphine sulfate concentrate<br>(preservative free) |                                               |
| 1.76184 | MORPHINE<br>Morphine Hydrochloride                                      | Analgesic                                     |
| 1.73457 | ACRISORCIN                                                              | Antifungal                                    |
| 1.73457 | HEXYLRESORCINOL                                                         | Anthelminthic                                 |
| 1.72351 | CICLOPIROX OLAMINE                                                      | Antifungal                                    |
| 1.72233 | CICLOPIROX                                                              | Antifungal                                    |
| 1.6687  | METHYCLOTHIAZIDE                                                        | Diuretic                                      |
| 1.66708 | RAMELTEON                                                               | Anxiolytic                                    |
| 1.59483 | METHOCARBAMOL                                                           | Muscle relaxant<br>Muscle relaxant (skeletal) |
| 1.58606 | AMOBARBITAL<br>Amobarbital Sodium                                       | Sedative                                      |
| 1.54448 | ETHOTOIN                                                                | Anticonvulsant.<br>Anticonvulsant             |
| 1.53768 | TALBUTAL                                                                | Sedative                                      |
| 1.48706 | PHENYRAMIDOL<br>Phenylramidol Hydrochloride                             | Analgesic                                     |

|          |                                                                              |                  |
|----------|------------------------------------------------------------------------------|------------------|
| 1.46098  | MAZINDOL                                                                     | Anorexic         |
| 1.42678  | ETHYL VANILLATE NG<br>Ethyl Vanillate                                        | Antiseptic       |
| 1.39667  | VILOXAZINE<br>Viloxazine Hydrochloride                                       | Antidepressant   |
| 1.38498  | Methylphenidate<br>DEXMETHYLPHENIDATE<br>Dexmethylphenidate<br>Hydrochloride | Nootropic        |
| 1.34472  | TRAMADOL<br>Tramadol hydrochloride                                           | Analgesic        |
| 1.3286   | 1,3-DIMETHYLBUTYL<br>SALICYLATE 5.0%<br>1,3 Dimethylbutyl Salicylate         | Antiinflammatory |
| 1.32048  | OXAZEPAM                                                                     | Anxiolytic       |
| 1.29591  | MELPHALAN                                                                    | Antineoplastic   |
| 1.29194  | Allobarbitol                                                                 | Sedative         |
| 1.27263  | FUROSEMIDE                                                                   | Diuretic         |
| 1.25673  | OXCARBAZEPINE                                                                | Anticonvulsant   |
| 1.25425  | GUAIFENESIN                                                                  | Expectorant      |
| 1.23631  | BUTALBITAL                                                                   | Sedative         |
| 1.20772  | DEZOCINE                                                                     | Analgesic        |
| 1.17107  | LEVETIRACETAM<br>Etiracetam                                                  | Anticonvulsant   |
| 1.13128  | CYCLOPHOSPHAMIDE                                                             | Antineoplastic   |
| 0.994299 | CARBAMAZEPINE                                                                | Anticonvulsant   |
| 0.990726 | LEFLUNOMIDE                                                                  | Antirheumatic    |
| 0.966053 | PRAMIPEXOLE                                                                  | Antiparkinsonian |
| 0.920325 | BUTABARBITAL                                                                 | Sedative         |
| 0.834914 | ALOSETRON<br>Alosetron Hydrochloride                                         | Antidiarrheal    |
| 0.813755 | ETHAMIVAN                                                                    | Nootropic        |
| 0.808493 | HEXYLCAINE                                                                   | Anesthetic       |

|          |                                                                                                    |                                             |
|----------|----------------------------------------------------------------------------------------------------|---------------------------------------------|
|          | Hexylcaine Hydrochloride                                                                           |                                             |
| 0.781187 | Lofexidine Hydrochloride<br>Lofexidine                                                             | Antihypertensive                            |
| 0.713663 | METHALLATAL 0.15GM<br>Methallatal                                                                  | Antiemetic                                  |
| 0.696448 | MONOCTANOIN<br>Monoctanoïn                                                                         | Anticholelithogenic                         |
| 0.633994 | BENZOIN TINCTURE,<br>COMPOUND 0.5OZ"<br><br>BENZOIN<br><br>Benzoin Tincture<br><br>Bitter Tincture | Antiseptic<br><br>Therapeutic plant extract |
| 0.612587 | MEBUTAMATE                                                                                         | Antihypertensive                            |
| 0.596225 | DICLOFENAC<br><br>Diclofenac Sodium                                                                | Antiinflammatory                            |
| 0.446284 | HEPTABARBITAL                                                                                      | Sedative                                    |
| 0.441581 | PHENPROCOUMON                                                                                      | Anticoagulant                               |
| 0.392467 | GALANTAMINE                                                                                        | Nootropic                                   |
| 0.27683  | HOMATROPINE                                                                                        | Mydriatic                                   |
| 0.27683  | HomatropineHydrobromide                                                                            | Mydriatic                                   |
| 0.262311 | APROBARBITAL                                                                                       | Sedative                                    |
| 0.249796 | BROMFENAC<br><br>Bromfenac Sodium                                                                  | Antiinflammatory                            |
| 0.073764 | Metabutethamine<br>Hydrochloride<br><br>Metabutethamine                                            | Anesthetic                                  |
| 0.043867 | GLUTETHIMIDE                                                                                       | Sedative                                    |
